# Supplementary material
Source: MDPI journal article supplement (https://www.mdpi.com/2079-9292/12/1/73)
Supplement: s1 [file s1]

<sup>1</sup> DISAT–Politecnico di Torino, Corso Duca degli Abruzzi 24, 10129 Turin, Italy  
<sup>2</sup> CNR-IMEM, Parco Area delle Scienze 37<sup>o</sup>, 43124 Parma, Italy  
<sup>3</sup> PolitoBIOMed Lab, Politecnico di Torino, C.so Duca degli Abruzzi 24, 10129 Turin, Italy  
<sup>4</sup> Center for Sustainable Future Technologies, Italian Institute of Technology, Via Livorno 60, 10144 Turin, Italy  
\* Correspondence: nicolo.cacocciola@polito.it (N.C.); simone.marasso@polito.it (S.L.M.); Tel.: +39-349-060-9967 (C.N.); +39-011-090-8406 (S.L.M.)

[illegible]

```

{
  byte _status;
  unsigned int H_dat, T_dat;
  float RH, T_C;

  while(1)
  {
    for(t=0;t<timer_p;t++)
    {
      digitalWrite(2, HIGH);
      digitalWrite(4, LOW);
      colore(0,255,0);

      _status = fetch_humidity_temperature(&H_dat, &T_dat);
      RH = (float) H_dat * 6.10e-3;
      T_C = (float) T_dat * 1.007e-2 - 40.0;
      val = analogRead(analogPin);
      if (val<38) {val = 38;}

      if (val>1015) {val = 1015;}

      Pressure = map (val, 38, 1015, 0, 10000);
      Serial.print(Pressure);

      Serial.print(" ");

      print_float(T_C, 2);
      Serial.print(" ");
      print_float(RH, 1);
      Serial.println();
    }

    for(t=0;t<timer_sv;t++)
    {
      digitalWrite(2, LOW);
      digitalWrite(4, HIGH);
      colore(0,255,0);

      _status = fetch_humidity_temperature(&H_dat, &T_dat);
      RH = (float) H_dat * 6.10e-3;
      T_C = (float) T_dat * 1.007e-2 - 40.0;
      val = analogRead(analogPin);
      if (val<38) {val = 38;}

      if (val>1015) {val = 1015;}

      Pressure = map (val, 38, 1015, 0, 10000);
      Serial.print(Pressure);

      Serial.print(" ");

      print_float(T_C, 2);

```

```

    Serial.print(" ");
    print_float(RH, 1);
    Serial.println();
  }
}
}
byte fetch_humidity_temperature(unsigned int *p_H_dat, unsigned int *p_T_dat)
{
    byte address, Hum_H, Hum_L, Temp_H, Temp_L, _status;
    unsigned int H_dat, T_dat;
    address = 0x27;;
    Wire.beginTransmission(address);
    Wire.endTransmission();
    delay(100);

    Wire.requestFrom(((int)address, (int) 4);
    Hum_H = Wire.read();
    Hum_L = Wire.read();
    Temp_H = Wire.read();
    Temp_L = Wire.read();
    Wire.endTransmission();

    _status = (Hum_H >> 6) & 0x03;
    Hum_H = Hum_H & 0x3f;
    H_dat = (((unsigned int)Hum_H) << 8) | Hum_L;
    T_dat = (((unsigned int)Temp_H) << 8) | Temp_L;
    T_dat = T_dat / 4;
    *p_H_dat = H_dat;
    *p_T_dat = T_dat;
    return(_status);
}

void print_float(float f, int num_digits)
{
    int f_int;
    int pows_of_ten[4] = {1, 10, 100, 1000};
    int multiplier, whole, fract, d, n;

    multiplier = pows_of_ten[num_digits];
    if (f < 0.0)
    {
        f = -f;
        Serial.print("-");
    }
    whole = (int) f;
    fract = (int) (multiplier * (f - (float)whole));

    Serial.print(whole);
    Serial.print(".");

    for (n=num_digits-1; n>=0; n--) // print each digit with no leading zero suppression
    {

```

```
d = fract / pows_of_ten[n];
Serial.print(d);
fract = fract % pows_of_ten[n];
}
}
```
